# Supplementary material for: Current smoking, former smoking, and adverse outcome among hospitalized COVID-19 patients: a systematic review and meta-analysis
Source: PubMed Central journal article supplement — Ther Adv Chronic Dis. 2020 Jun 25;11:2040622320935765. doi: 10.1177/2040622320935765 (PMC7318805; doi:10.1177/2040622320935765), 2020-06-25

**Supplementary Table 1. Definition of outcomes in the studies examined.**

|                                 | <b>Definition of adverse outcome</b>                                                                                                                                                                                                                                                                                                                                                                                                                                                                                             |
|---------------------------------|----------------------------------------------------------------------------------------------------------------------------------------------------------------------------------------------------------------------------------------------------------------------------------------------------------------------------------------------------------------------------------------------------------------------------------------------------------------------------------------------------------------------------------|
| Guan et al. <sup>9</sup>        | Composite end point of admission to an intensive care unit, the use of mechanical ventilation, or death.                                                                                                                                                                                                                                                                                                                                                                                                                         |
| Chen et al. <sup>10</sup>       | Mild vs. Severe disease                                                                                                                                                                                                                                                                                                                                                                                                                                                                                                          |
| Zhou et al. <sup>11</sup>       | Death                                                                                                                                                                                                                                                                                                                                                                                                                                                                                                                            |
| Mo et al. <sup>12</sup>         | Death                                                                                                                                                                                                                                                                                                                                                                                                                                                                                                                            |
|                                 | Refractory disease, defined as not fulfilling the following criteria: (i) obvious alleviation of respiratory symptoms (eg. cough, chest distress and breath shortness) after treatment; (ii) maintenance of normal body temperature for $\geq 3$ days without the use of corticosteroid or antipyretics; (iii) improvement in radiological abnormalities on chest CT or X-ray after treatment; (iv) a hospital stay of $\leq 10$ days.                                                                                           |
| Zhang et al. <sup>13</sup>      | Severe disease, designated when the patients had one of the following criteria:<br>(a) respiratory distress with respiratory frequency $\geq 30$ /min; (b) pulse oximeter oxygen saturation $\leq 93\%$ at rest; and (c) oxygenation index (artery partial pressure of oxygen/inspired oxygen fraction, PaO <sub>2</sub> / FiO <sub>2</sub> ) $\leq 300$ mm Hg.                                                                                                                                                                  |
| Wan et al. <sup>14</sup>        | Severe disease, defined as having: respiratory distress, RR $\geq 30$ beats/minute in a resting state, a mean oxygen saturation of $\leq 93\%$ , and an arterial blood oxygen partial pressure (PaO <sub>2</sub> )/oxygen concentration (FiO <sub>2</sub> ) $\leq 300$ mmHg. Critical cases were also included, defined as: having respiratory failure and requiring mechanical ventilation, the occurrence of shock, and the combined failure of other organs that required intensive care unit (ICU) monitoring and treatment. |
| Liu et al. <sup>15</sup>        | Disease progression, defined as: common-type disease changed to severe- or critical-type, or death; severe-type changed to critical-type or death; critical-type progressed to death.                                                                                                                                                                                                                                                                                                                                            |
| Huang et al. <sup>16</sup>      | ICU care.                                                                                                                                                                                                                                                                                                                                                                                                                                                                                                                        |
| Zhang, Cai et al. <sup>17</sup> | Pneumonia, diagnosed based on imaging findings (abnormal imaging findings).                                                                                                                                                                                                                                                                                                                                                                                                                                                      |
| Shi et al. <sup>18</sup> (1)    | Occurrence of death or severe cases                                                                                                                                                                                                                                                                                                                                                                                                                                                                                              |
| Yang, Yu et al. <sup>19</sup>   | Death                                                                                                                                                                                                                                                                                                                                                                                                                                                                                                                            |
| Kim et al. <sup>20</sup>        | Oxygen administration in mask or nasal canula                                                                                                                                                                                                                                                                                                                                                                                                                                                                                    |
| CDC <sup>21</sup>               | ICU Admission                                                                                                                                                                                                                                                                                                                                                                                                                                                                                                                    |
|                                 | Not hospitalized vs. hospitalized                                                                                                                                                                                                                                                                                                                                                                                                                                                                                                |
| Li et al. <sup>22</sup>         | Severe disease                                                                                                                                                                                                                                                                                                                                                                                                                                                                                                                   |
| Wang et al. <sup>23</sup>       | Critical patients                                                                                                                                                                                                                                                                                                                                                                                                                                                                                                                |
| Feng et al. <sup>24</sup>       | Severe, defined as respiratory distress or respiratory rate $\geq 30$ per min or oxygen saturation on room air at rest $\leq 93\%$ or partial pressure of oxygen in arterial blood / fraction of inspired oxygen $\leq 300$ mmHg<br>Critical, defined as respiratory failure and mechanical ventilation or shock or other organ dysfunction needing intensive care unit treatment.                                                                                                                                               |
| Ji et al. <sup>25</sup>         | Progression to severe disease, defined as respiratory rate $\geq 30$ breaths/min or resting oxygen saturation $\leq 93\%$ or PaO <sub>2</sub> /FiO <sub>2</sub> $\leq 300$ mmHg or requirement of mechanical ventilation or worsening lung CT.                                                                                                                                                                                                                                                                                   |
| Goyal et al. <sup>26</sup>      | Invasive mechanical ventilation                                                                                                                                                                                                                                                                                                                                                                                                                                                                                                  |
| <b>Pre-publications</b>         |                                                                                                                                                                                                                                                                                                                                                                                                                                                                                                                                  |
| Petrilli et al. <sup>28</sup>   | Critical illness                                                                                                                                                                                                                                                                                                                                                                                                                                                                                                                 |
| Tabata et al. <sup>29</sup>     | Severe symptomatic, defined as showing clinical symptoms of pneumonia (dyspnea, tachypnea, peripheral capillary oxygen saturation $< 93\%$ , and need for oxygen therapy)                                                                                                                                                                                                                                                                                                                                                        |
| Fu et al. <sup>30</sup> (4)     | Death                                                                                                                                                                                                                                                                                                                                                                                                                                                                                                                            |
| Chen, Tu et al. <sup>31</sup>   | Severe                                                                                                                                                                                                                                                                                                                                                                                                                                                                                                                           |
| Rentsch et al. <sup>32</sup>    | Hospitalization                                                                                                                                                                                                                                                                                                                                                                                                                                                                                                                  |
| Hu, Chen et al. <sup>33</sup>   | Unfavorable outcome, defined as death, progression from non-severe to severe/critical disease status or severe to critical status, and/or maintenance of severe or critical status.                                                                                                                                                                                                                                                                                                                                              |
| Luo et al. <sup>34</sup>        | Death                                                                                                                                                                                                                                                                                                                                                                                                                                                                                                                            |
| Ma et al. <sup>35</sup>         | Severe                                                                                                                                                                                                                                                                                                                                                                                                                                                                                                                           |
| Luo, Zhou, et al. <sup>36</sup> | Death                                                                                                                                                                                                                                                                                                                                                                                                                                                                                                                            |
| Xu et al. <sup>37</sup>         | Severe, defined as respiratory rate $> 30$ breaths/min, severe respiratory distress, or SpO <sub>2</sub> $< 90\%$ on room air. or critical, defined as pneumonia (ARDS, sepsis, septic shock).                                                                                                                                                                                                                                                                                                                                   |
| Cao et al. <sup>38</sup>        | ICU                                                                                                                                                                                                                                                                                                                                                                                                                                                                                                                              |
| Qi et al. <sup>39</sup>         | Severe                                                                                                                                                                                                                                                                                                                                                                                                                                                                                                                           |

Supplementary Figure 1. PRISMA flow diagram

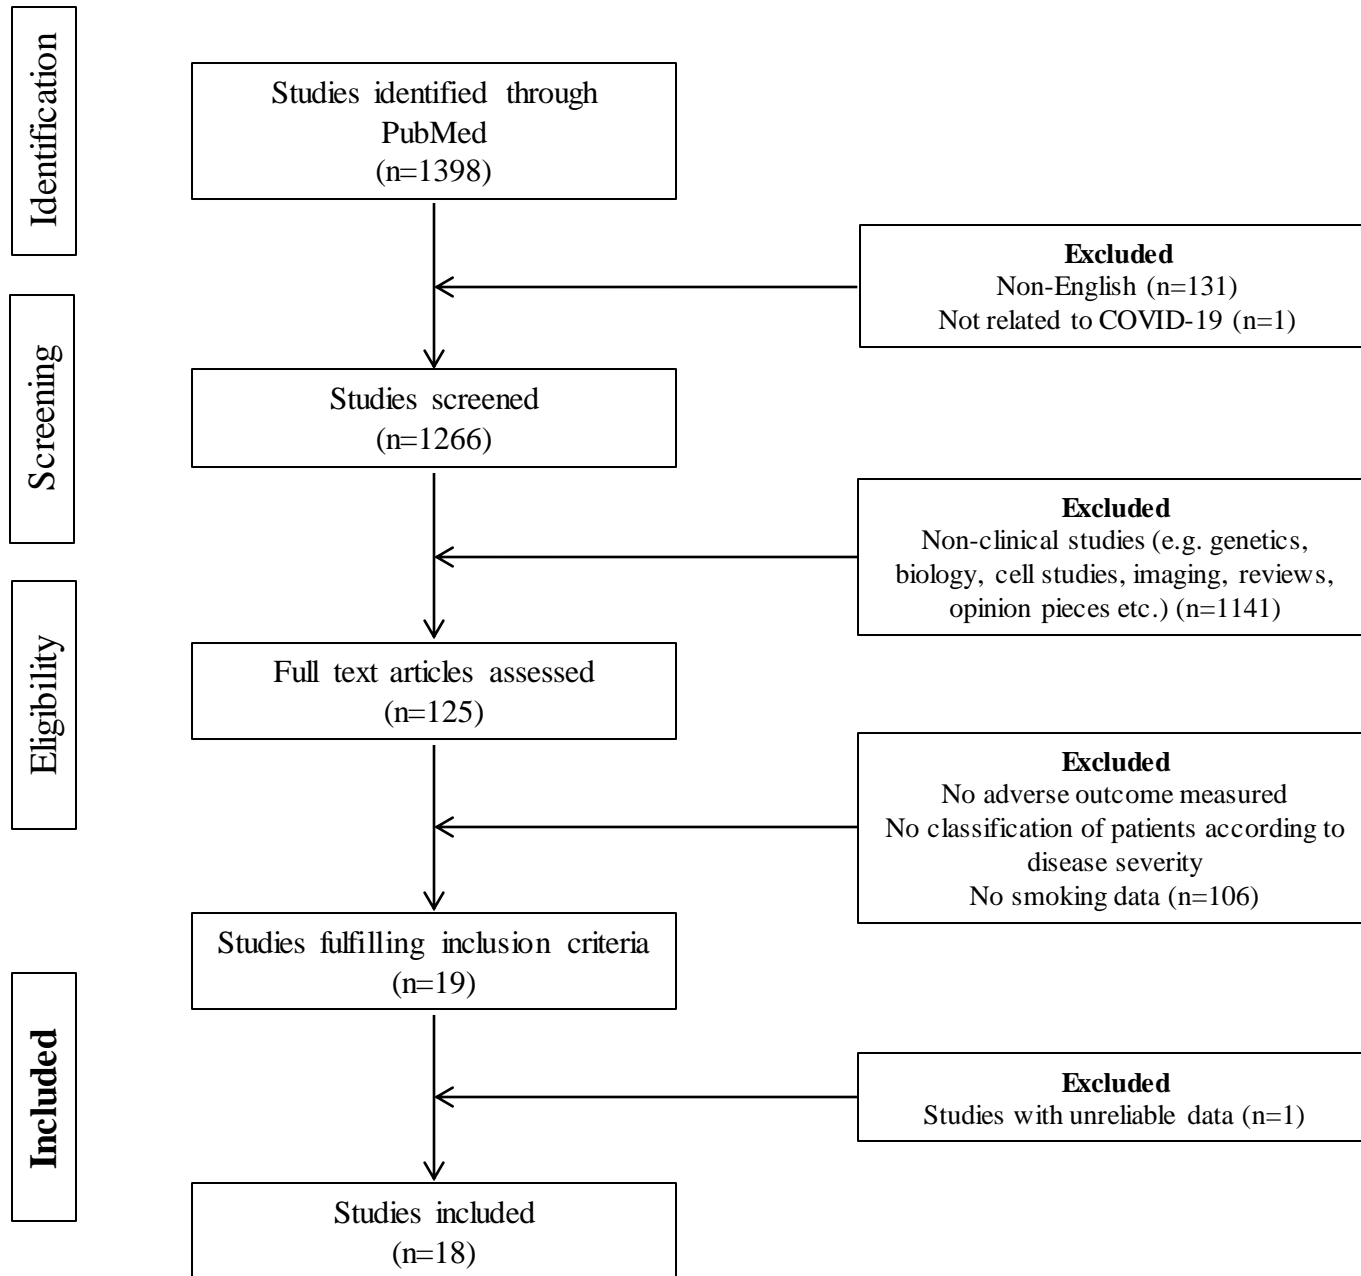

**Supplementary Figure 2.** Random-effects meta-analysis of the gender-adjusted prevalence odds ratio (POR). Analysis of all studies (published and pre-publications).

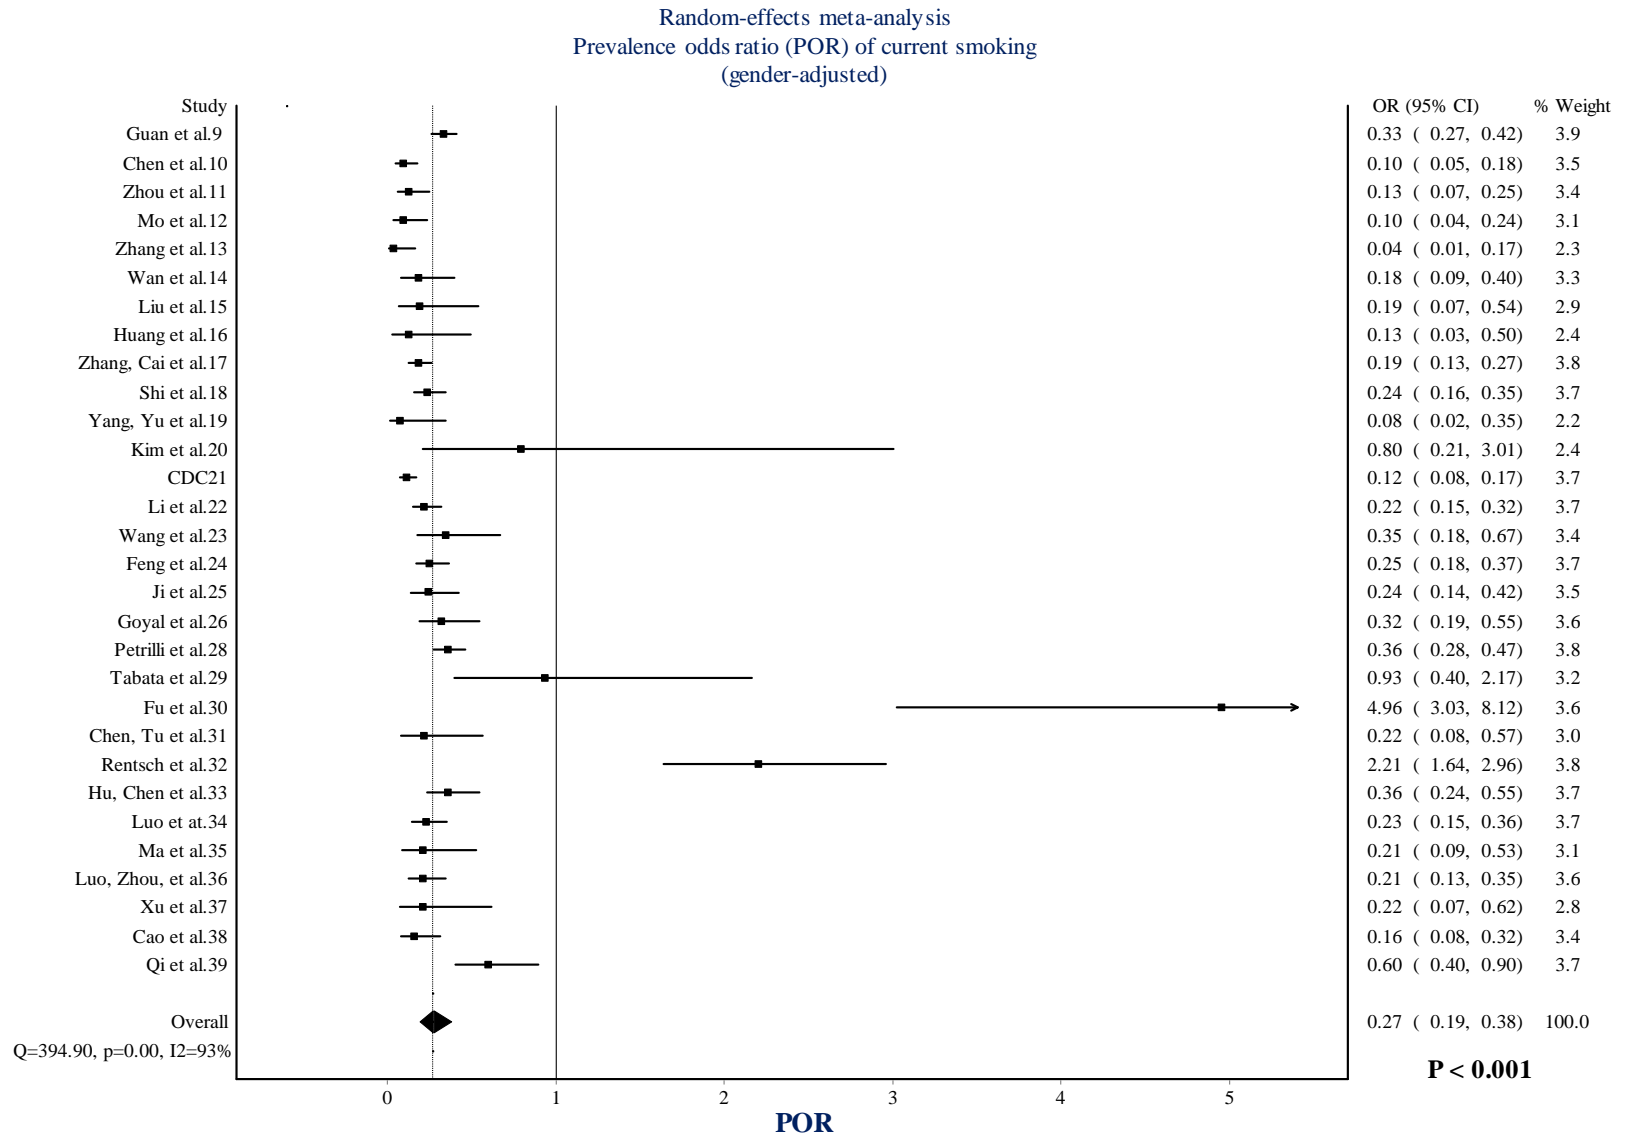

**Supplementary Figure 3.** Random-effects meta-analysis of the gender and age-adjusted prevalence odds ratio (POR). All patients were assumed to be aged  $\geq 65$  years. Analysis of all studies (published and pre-publications).

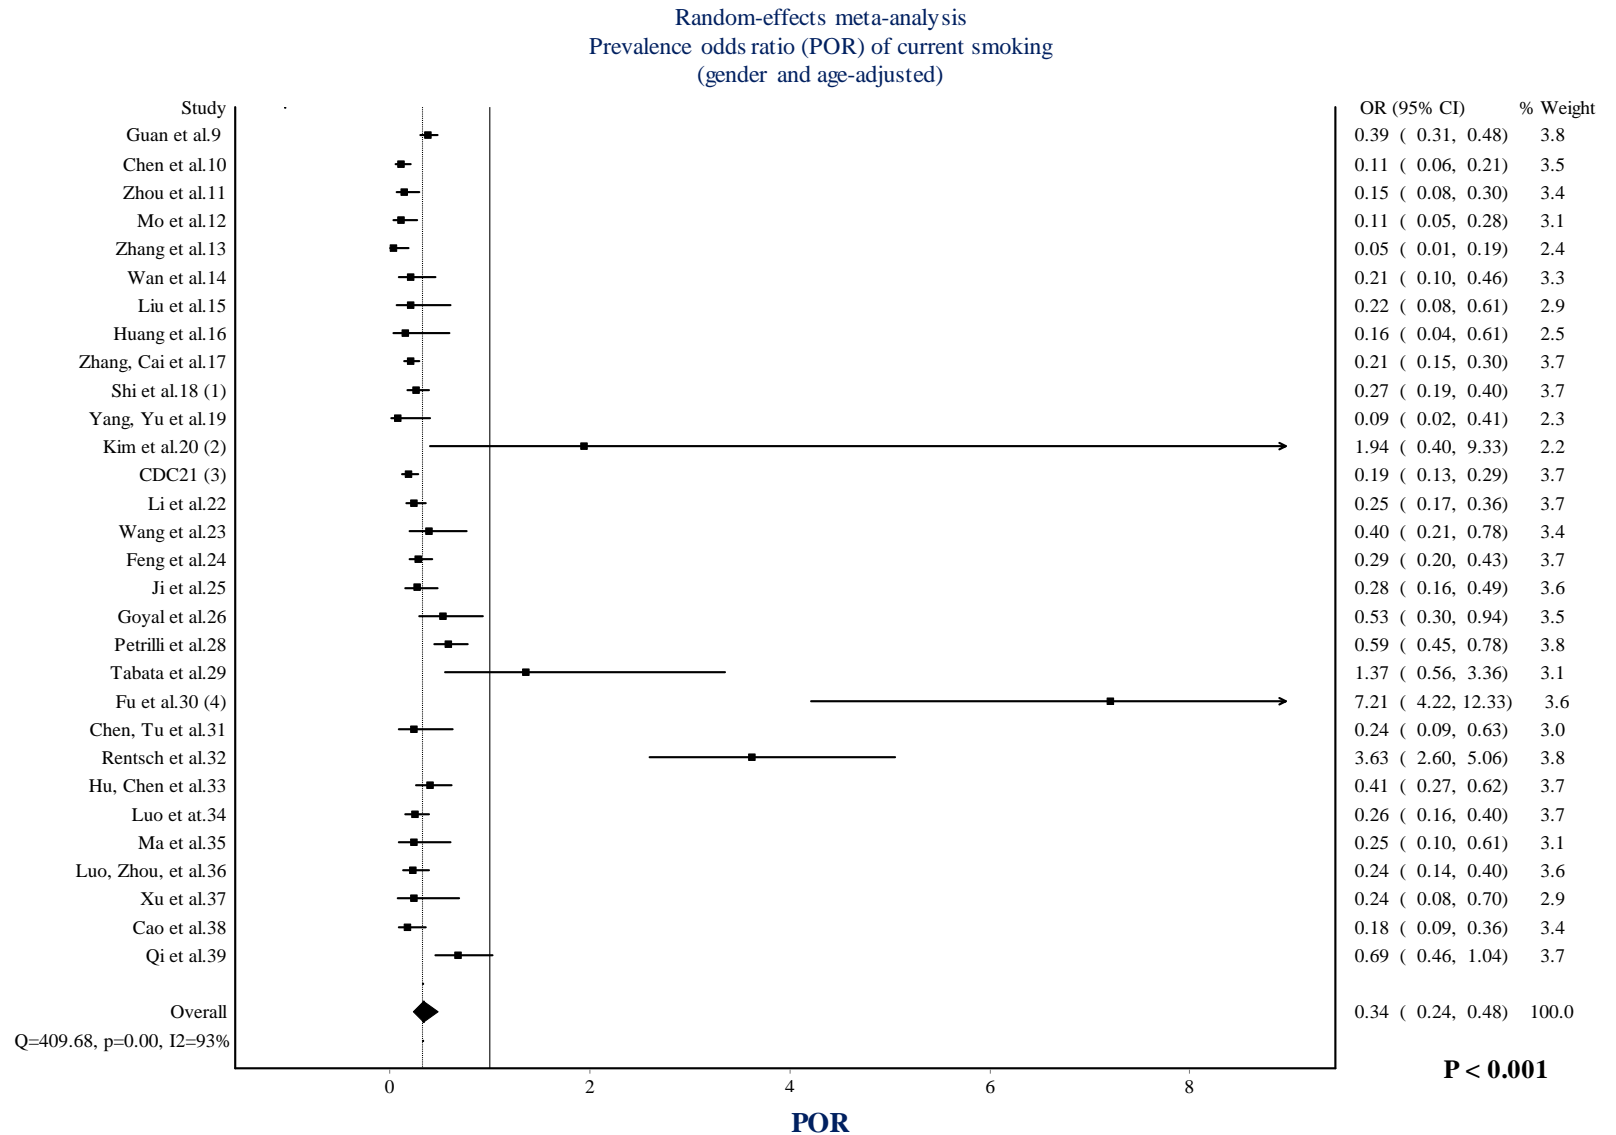

**Supplementary Figure 4.** Random-effects meta-analysis of the association between current (vs. non-current) smoking and adverse outcome in COVID-19. Analysis of all studies (published and pre-publications).

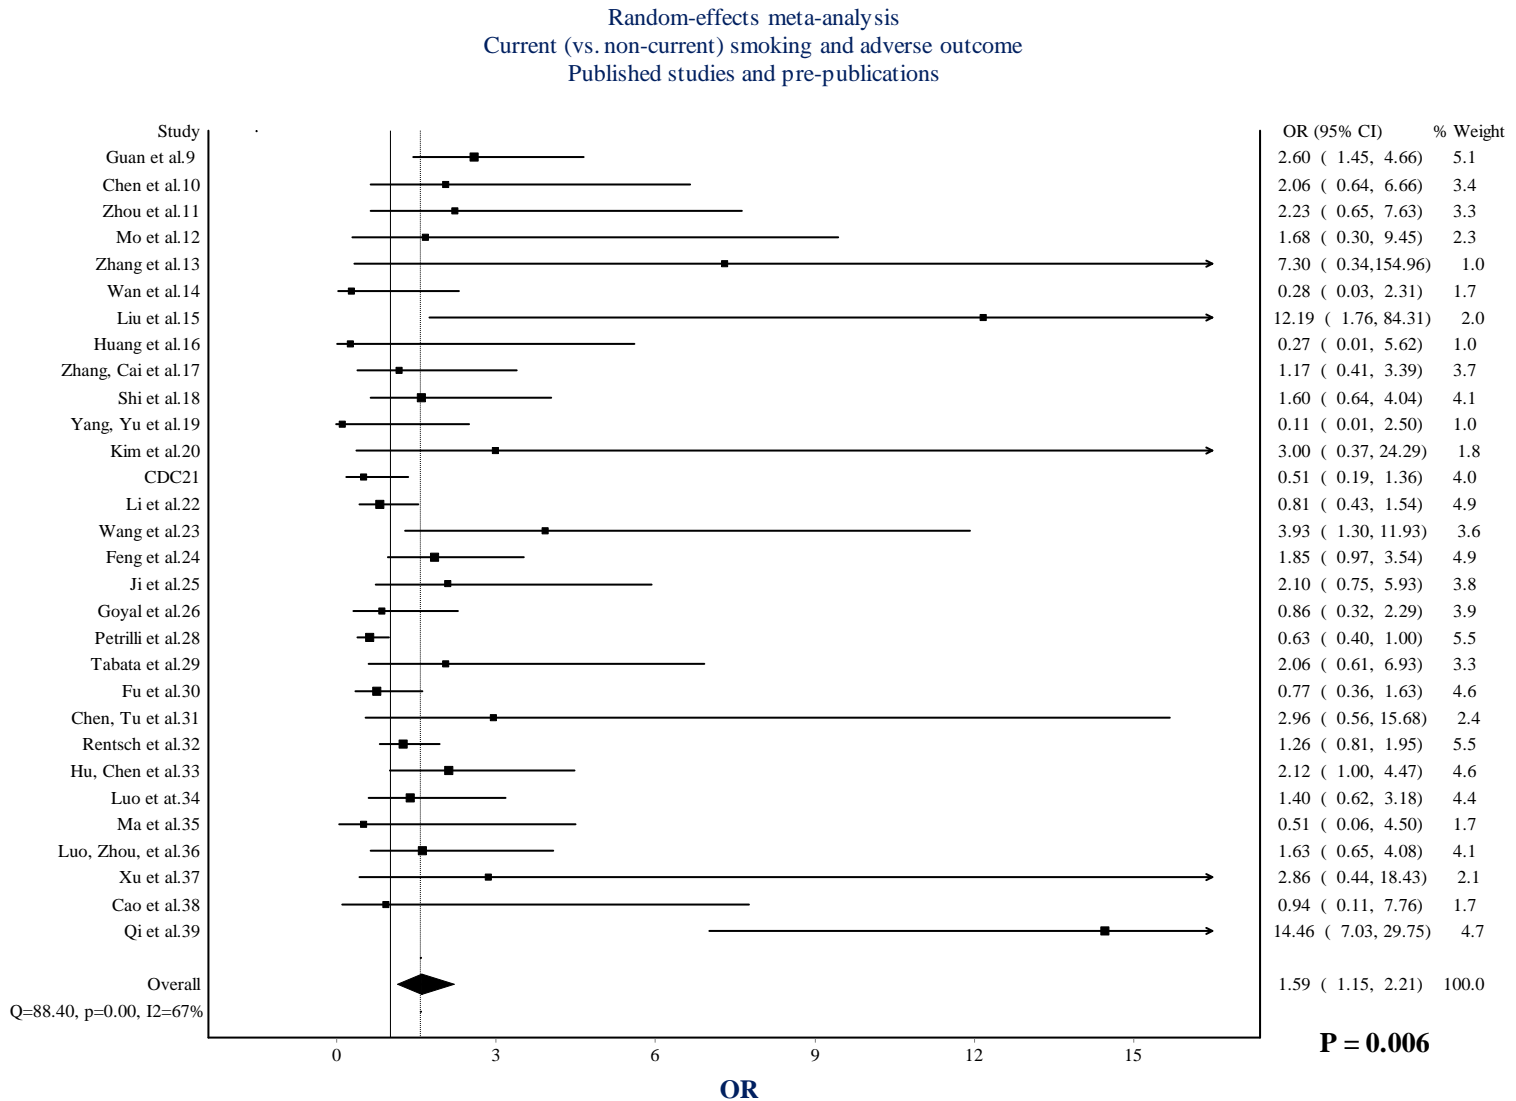

**Supplementary Figure 5.** Random-effects meta-analysis of the association between current (vs. former) smoking and adverse outcome in COVID-19. Analysis of all studies (published and pre-publications).

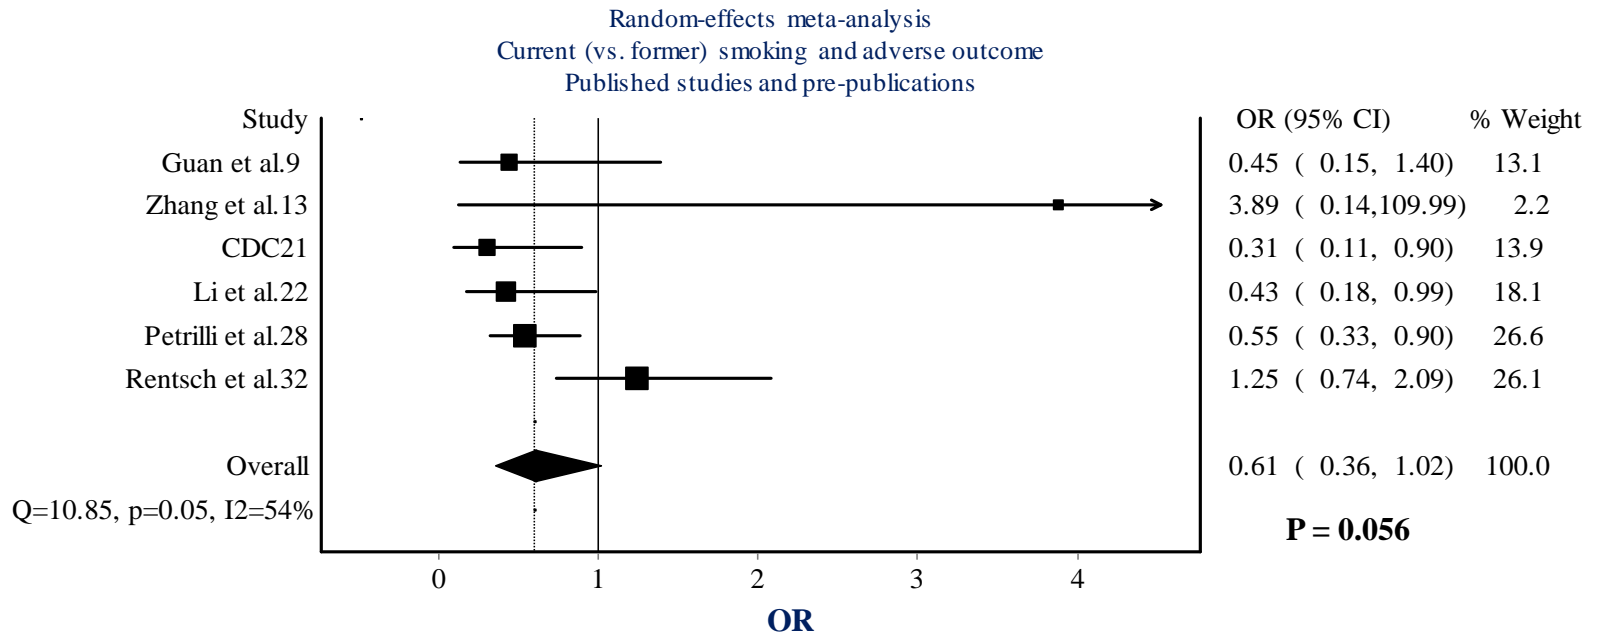

Supplement: Supplementary_file_TAJ.pdf [file Supplementary_file_TAJ.pdf]
